# Supplementary material
Source: Springer Nature journal article supplement (https://www.springermedizin.de/resource/supplementary/12971_2012_140_MOESM1_ESM.pdf/9595000)

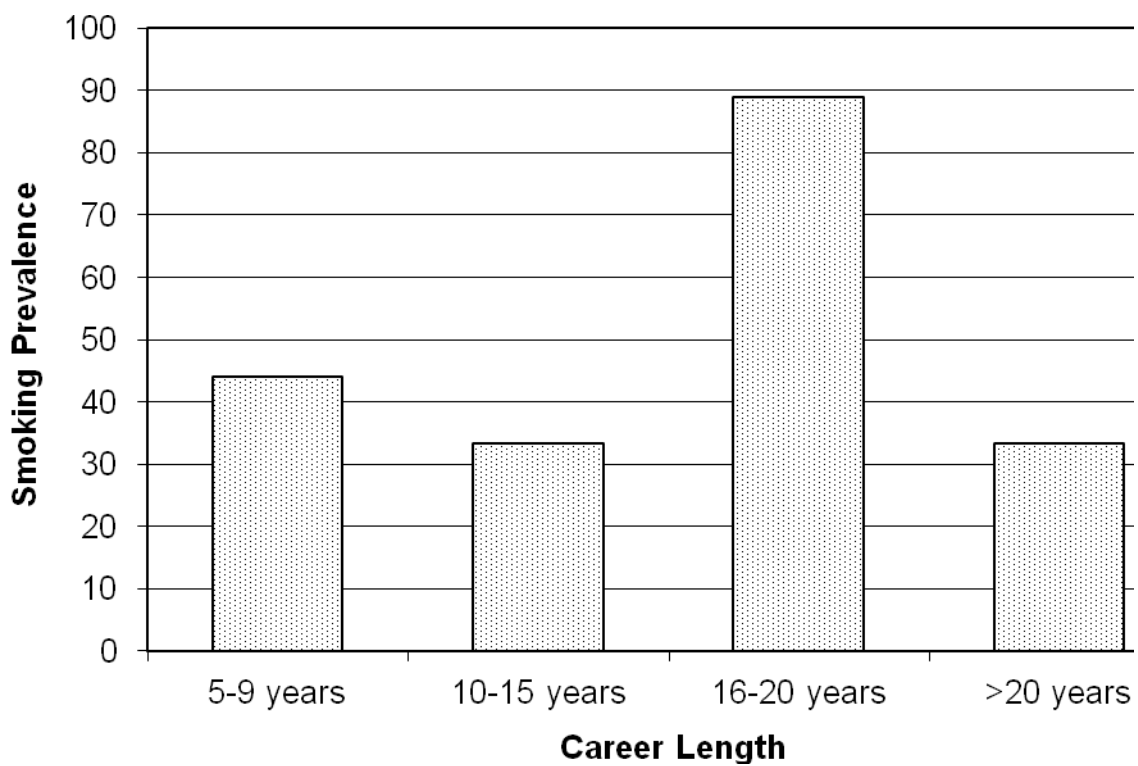

Supplement: MOESM1 [file 9595000]
